# Supplementary material
Source: Frontiers journal article supplement (https://www.frontiersin.org/articles/490775)
Supplement: Data_Sheet_1.docx [file Data_Sheet_1.docx]

**Appendix A: A Very Simple XACML Policy for our Proof-of-Concept Implementation**

<?xml version="1.0" encoding="UTF-8"?>

<Policy

xmlns="urn:oasis:names:tc:xacml:3.0:core:schema:wd-17"

xmlns:xsi=http://www.w3.org/2001/XMLSchema-instance

xsi:schemaLocation="urn:oasis:names:tc:xacml:3.0:core:schema:wd-17

http://docs.oasis-open.org/xacml/3.0/xacml-core-v3-schema-wd-17.xsd"

PolicyId="urn:oasis:names:tc:xacml:3.0:example:SimplePolicy1"

Version="1.0"

RuleCombiningAlgId="identifier:rule-combining-algorithm:deny-overrides">

<Description>

Overall XACML Description for demo company "Demo Corp".

</Description>

<Rule

RuleId= "urn:oasis:names:tc:xacml:3.0:example:SimpleRule1"

Effect="Permit">

<Description>

Check if the user's purpose is 'PUBLICHEALTH'; if so, permit access to the ID of patients.

</Description>

<Target>

<Subjects>

<Subject>

<SubjectMatch

MatchId="urn:oasis:names:tc:xacml:1.0:function:rfc822Name-match">

<AttributeValue

DataType=http://www.w3.org/2001/XMLSchema#string>

PUBLICHEALTH</AttributeValue>

<SubjectAttributeDesignator

MustBePresent="false"

Category="urn:oasis:names:tc:xacml:1.0:subject-category:access-subject"

AttributeId="urn:oasis:names:tc:xspa:1.0:subject:purposeofuse"

DataType="urn:oasis:names:tc:xacml:1.0:data-type:rfc822Name"/>

</SubjectMatch>

</Subject>

</Subjects>

<Resources>

<Resource>

<ResourceMatch MatchId="urn:oasis:names:tc:xacml:1.0:function:anyURI-equal">

<AttributeValue

DataType="http://www.w3.org/2001/XMLSchema#anyURI">

http://www.InternalSite.com/Database/Patients.html

</AttributeValue>

<ResourceAttributeDesignator

DataType=http://www.w3.org/2001/XMLSchema#anyURI

AttributeId="urn:oasis:names:tc:xspa:1.0:subject:npi"/>

</ResourceMatch>

</Resource>

</Resources>

</Target>

</Rule>

</Policy>

**Appendix B: The Simple P3P Policy that was derived from the XACML Policy in Appendix A**

<?xml version="1.0"?>

<POLICIES xmlns="http://www.w3.org/2002/01/P3Pv1" xmlns:p3p11="http://www.w3.org/2006/01/P3Pv11"

xmlns:pe="urn:oasis:names:tc:xacml:3.0:core:schema:wd-17">

<EXPIRY max-age="86400"/>

<POLICY name="pe:temporary" discuri="http://www.example.com/hi.html">

<ENTITY>

<DATA-GROUP>

<DATA ref="#business.name">Demo Corp</DATA>

<DATA ref="#business.contact-info.online.email">admin@democorp.org</DATA>

<DATA ref="#business.contact-info.online.uri">http://www.democorp.org</DATA>

<DATA ref="#business.contact-info.postal.organization">Organization Name</DATA>

<DATA ref="#business.contact-info.postal.city">Ottawa</DATA>

<DATA ref="#business.contact-info.postal.country">Canada</DATA>

</DATA-GROUP>

</ENTITY>

<ACCESS>

<none/>

</ACCESS>

<DISPUTES-GROUP>

<DISPUTES resolution-type="independent" service="http://www.PrivacySeal.example.org"

short-description="PrivacySeal.example.org">

<IMG src="http://www.PrivacySeal.example.org/Logo.gif" alt="PrivacySeal's logo"/>

<REMEDIES>

<correct/>

</REMEDIES>

</DISPUTES>

<DISPUTES resolution-type="service" service="http://www.sample.example.com/privacy.html"

short-description="Sample Example Customer Service">

<LONG-DESCRIPTION>

If you have any questions or concerns about our privacy policy please email privacy@sample.example.com or call 1-877-EXAMPLE.

</LONG-DESCRIPTION>

</DISPUTES>

</DISPUTES-GROUP>

<STATEMENT>

<PURPOSE>

<extension>

<ppurpose> <health/> </ppurpose>

</extension>

<current/>

<develop/>

<admin/>

</PURPOSE>

<RECIPIENT>

<ours/>

<public/>

</RECIPIENT>

<RETENTION>

<government/>

</RETENTION>

<CONSEQUENCE>

Check if the users' purpose is 'PUBLICHEALTH'; if so, permit access to the ID of patients.

</CONSEQUENCE>

<DATA-GROUP>

<DATA>

<CATEGORIES> <government/> </CATEGORIES>

</DATA>

</DATA-GROUP>

</STATEMENT>

</POLICY>

</POLICIES>

**Appendix C: An Example XSLT document that derives a P3P Policy from an XACML Policy**

Note: this example is relatively extensive, but is still a proof-of-concept XSLT document; it does not handle all possible XACML policies, rules, or allowable formats. It recognizes and processes the following elements:

- PolicySet and its attributes
- Policy and its attributes
- Expiry
- Access
- Statement
- Recipient and attributes (not including “description”)
- Purpose and attributes
- Retention
- Data-group and data
- Non-Identifiable

The three elements below are read from other sources:

- Entity data
- The URL of descuri
- The URL of opturi

<?xml version="1.0" encoding="UTF-8"?>

<xsl:stylesheet version="1.0" xmlns:xsl="http://www.w3.org/1999/XSL/Transform" xmlns:xsi="http://www.w3.org/2001/XMLSchema-instance" xmlns:p3p="http://www.w3.org/2002/01/P3Pv1" xmlns:xacml="urn:oasis:names:tc:xacml:1.0:policy" xmlns:n1="records" exclude-result-prefixes="xacml n1" <xsl:output method="xml" encoding="UTF-8" indent="yes"/>

<!--global parameters,for discuri, opturi, and entity files-->

<xsl:param name="discuri-file">http://www.xmlspy.com/privacy.html</xsl:param>

<xsl:param name="opturi-file">http:www.xmlspy.com/privacy.html</xsl:param>

<xsl:param name="entity-file">entityfile.xml</xsl:param>

<xsl:param name="recipient-descrip-file">recipient.txt</xsl:param>

<!--other keys and global variables-->

<xsl:variable name="entity-id">entity</xsl:variable>

<xsl:variable name="owner">owner</xsl:variable>

<xsl:variable name="nonowner">nonowner</xsl:variable>

<!-- for the records.xml file-->

<xsl:key name="record" match="n1:Record" use="@id"/>

<!--keys: rule grouping and global variables-->

<xsl:key name="rule-group" match="xacml:Rule" use="@Effect"/>

<!--keys: -->

<xsl:variable name="string-equal-key">urn:oasis:names:tc:xacml:1.0:function:string-equal</xsl:variable>

<xsl:variable name="string-one-and-only-key">urn:oasis:names:tc:xacml:1.0:function:string-one-and-only</xsl:variable>

<xsl:variable name="or-key">urn:oasis:names:tc:xacml:1.0:function:or</xsl:variable>

<xsl:variable name="and-key">urn:oasis:names:tc:xacml:1.0:function:and</xsl:variable>

<xsl:variable name="recipient-subject-key">urn:oasis:names:tc:xacml:1.0:subject-category:recipient-subject</xsl:variable>

<xsl:variable name="current-date-key">urn:oasis:names:tc:xacml:1.0:environment:current-dateTime</xsl:variable>

<xsl:variable name="date-comparision-key">urn:oasis:names:tc:xacml:1.0:function:date-less-or-equal</xsl:variable>

<xsl:variable name="action-purpose-key">urn:oasis:names:tc:xacml:1.0:action:action-purpose</xsl:variable>

<xsl:variable name="action-purpose-specific-key">urn:oasis:names:tc:xacml:1.0:action:action-purpose-specific</xsl:variable>

<xsl:variable name="subject-category-key">urn:oasis:names:tc:xacml:1.0:subject-category</xsl:variable>

<xsl:variable name="xpath-key">urn:oasis:names:tc:xacml:1.0:resource:xpath</xsl:variable>

<xsl:variable name="rescource-id-key">urn:oasis:names:tc:xacml:1.0:resource:resource-id</xsl:variable>

<!--xacml:PolicySet=>p3p: POLICIES-->

<xsl:template match="/xacml:PolicySet">

<p3p:POLICIES>

<xsl:attribute name="xsi:schemaLocation">http://www.w3.org/2002/01/P3Pv1 http://www.w3.org/2002/01/P3Pv1.xsd</xsl:attribute>

<xsl:apply-templates select="xacml:Policy"/>

</p3p:POLICIES>

</xsl:template>

<!--xacml:policy=>p3p:POLICY-->

<xsl:template match="xacml:Policy">

<p3p:POLICY>

<xsl:attribute name="name"><xsl:value-of select="@PolicyId"/></xsl:attribute>

<xsl:attribute name="discuri"><xsl:value-of select="$discuri-file"/></xsl:attribute>

<xsl:attribute name="opturi"><xsl:value-of select="$opturi-file"/></xsl:attribute>

<!--data file name-->

<xsl:variable name="rescource-node" select="xacml:Target//xacml:ResourceMatch[xacml:ResourceAttributeDesignator/@AttributeId=$rescource-id-key]"/>

<xsl:variable name="data-file" select="normalize-space($rescource-node/xacml:AttributeValue/text())"/>

<xsl:call-template name="entity"/>

<xsl:call-template name="access">

<xsl:with-param name="file-uri" select="$data-file"/>

</xsl:call-template>

<xsl:call-template name="statements">

<xsl:with-param name="file-uri" select="$data-file"/>

</xsl:call-template>

</p3p:POLICY>

</xsl:template>

<!--entity information from the "entityfile.xml"-->

<xsl:template name="entity">

<p3p:ENTITY>

<xsl:variable name="entity-info" select="document($entity-file)"/>

<xsl:for-each select="$entity-info">

<!--change to document records.xml nodes-->

<p3p:DATA-GROUP>

<xsl:for-each select="key('record',$entity-id)/n1:Data-group/*">

<p3p:DATA ref="{@ref}">

<xsl:value-of select="."/>

</p3p:DATA>

</xsl:for-each>

</p3p:DATA-GROUP>

</xsl:for-each>

</p3p:ENTITY>

</xsl:template>

<!--access information-->

<xsl:template name="access">

<!--for owner rules, regardless of whether it is write or read -->

<xsl:param name="file-uri"/>

<xsl:variable name="group" select="//xacml:Rule"/>

<xsl:for-each select="$group">

<xsl:variable name="current-node" select="current()"/>

<xsl:variable name="category" select="xacml:Condition//xacml:SubjectAttributeDesignator[@AttributeId=$subject-category-key]"/>

<xsl:for-each select="$category">

<xsl:if test=" ../@FunctionId=$string-one-and-only-key and ancestor::*[2]/xacml:AttributeValue/text()=$owner">

<xsl:apply-templates select="$current-node" mode="access">

<xsl:with-param name="data-file-uri" select="$file-uri"/>

</xsl:apply-templates>

</xsl:if>

</xsl:for-each>

</xsl:for-each>

</xsl:template>

<xsl:template match="xacml:Condition" mode="access">

<xsl:param name="data-file-uri"/>

<!--construct element-->

<xsl:variable name="permit-group" select="//xacml:Rule[@Effect='Permit']"/>

<xsl:variable name="$deny-group" select="//xacml:Rule[@Effect='Deny']"/>

<xsl:for-each select="$permit-group">

<xsl:for-each select="../[@FunctionId=$string-equal-key]">

<xsl:if test=" ../@FunctionId=$string-one-and-only-key">

<xsl:variable name="attribute-value" select="xacml:AttributeValue"/>

<xsl:variable name="selector" select=".//xacml:AttributeSelector"/>

<xsl:if test="$selector and contains($selector/@RequestContextPath,'contact')"></xsl:if>

</xsl:if>

</xsl:for-each>

</xsl:for-each>

<xsl:for-each select="$deny-group">

<xsl:for-each select="../[@FunctionId=$string-equal-key]">

<xsl:if test=" ../@FunctionId=$string-one-and-only-key">

<xsl:variable name="attribute-value" select="xacml:AttributeValue"/>

<xsl:variable name="selector" select=".//xacml:AttributeSelector"/>

<xsl:if test="$selector and contains($selector/@RequestContextPath,'nonident')"></xsl:if>

</xsl:if>

</xsl:for-each>

</xsl:for-each>

<xsl:if test="">

<p3p:ACCESS>

<xsl:value-of select="ident-contact"/>

</p3p:ACCESS>

</xsl:if>

<xsl:if test="">

<p3p:ACCESS>

<xsl:value-of select="other-ident"/>

</p3p:ACCESS>

</xsl:if>

<xsl:if test="">

<p3p:ACCESS>

<xsl:value-of select="contact-and-other"/>

</p3p:ACCESS>

</xsl:if>

…

*Please note that due to space constraints, only a portion of the XSLT document is shown in this paper. The full XSLT document is available at* [*http://www.site.uottawa.ca/~cadams/papers/XSLTDoc(ExtendedAPEX-AppendixC).pdf*](http://www.site.uottawa.ca/~cadams/papers/XSLTDoc(ExtendedAPEX-AppendixC).pdf)*.*
